# Supplementary material for: Exploring the interaction of phenothiazinium dyes methylene blue, new methylene blue, azure A and azure B with tRNAPhe: spectroscopic, thermodynamic, voltammetric and molecular modeling approach
Source: Royal Society of Chemistry journal article supplement (doi:10.1039/c6cp07888e), 2017-01-01
Supplement: c6cp07888e1.pdf [file c6cp07888e1.pdf]

## Exploring the interaction of phenothiazinium dyes methylene blue, new methylene blue, azure A and azure B to tRNA<sup>phe</sup>: Spectroscopic, thermodynamic, voltammetric and molecular modeling approach

Puja Paul,<sup>†,‡</sup> Soumya Sundar Mati<sup>¶</sup>, Subhash Chandra Bhattacharya<sup>‡</sup> and Gopinatha Suresh Kumar<sup>†,\*</sup>

<sup>†</sup>Biophysical Chemistry Laboratory, Organic and Medicinal Chemistry Division, CSIR-Indian Institute of Chemical Biology, Kolkata 700 032, India

<sup>‡</sup>Department of Chemistry, Jadavpur University, Kolkata 700 032, India

<sup>¶</sup> Government General Degree College, Keshiary, Paschim Medinipur, West Bengal 721135, India

### Supplementary Data

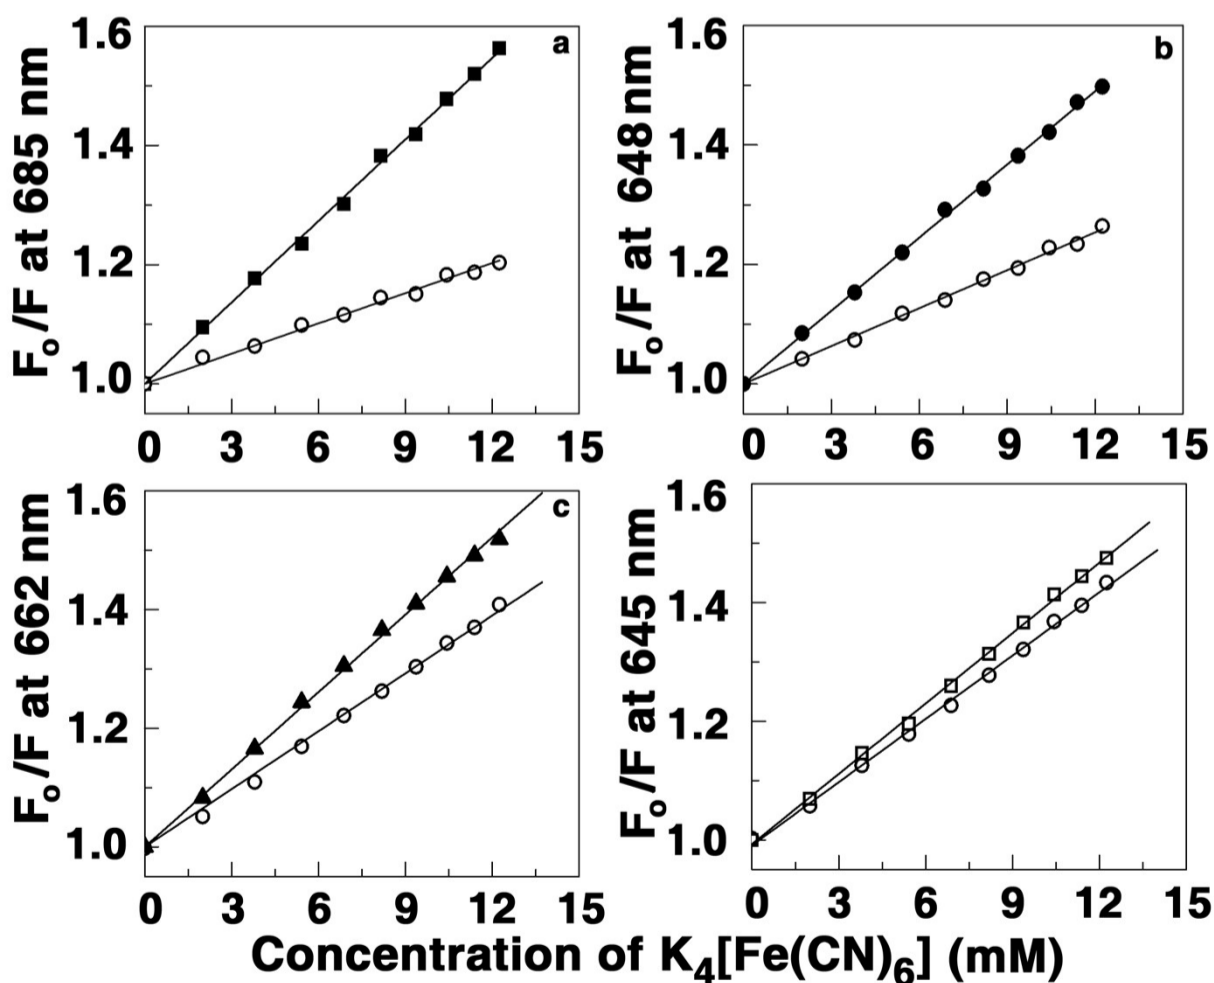

Fig. S1 Stern-Volmer plots for the quenching of (a) MB (■), (b) NMB (●), (c) AZB (▲) and (d) AZA (□) and their respective complexes (all ○) with increasing concentration of  $K_4[Fe(CN)_6]$  in presence of 20 mM sodium cacodylate buffer at pH 7.2.

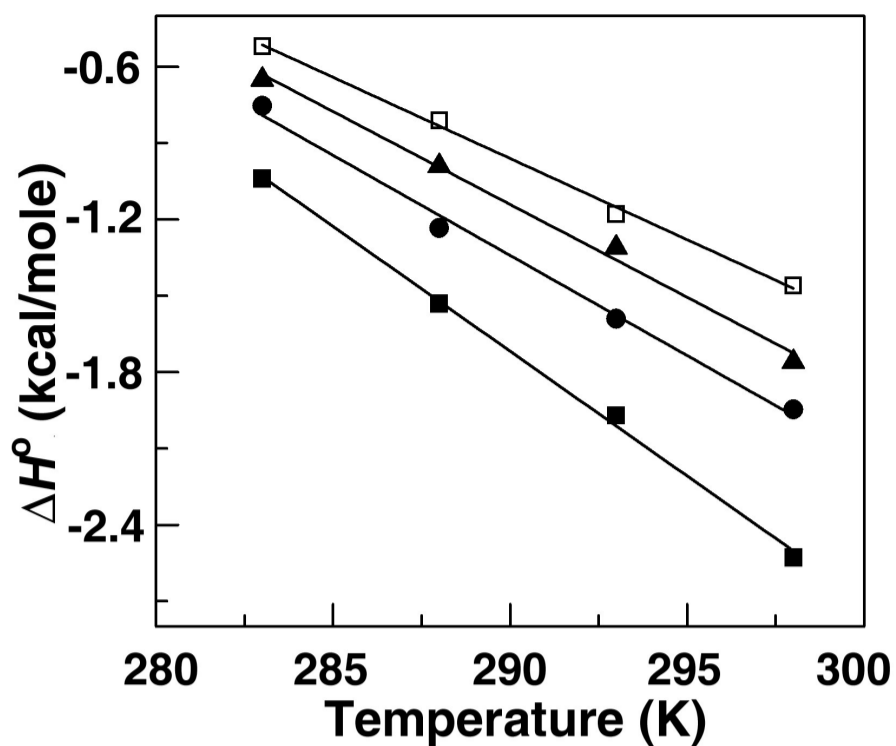

Fig. S2 Plot of variation of standard enthalpy of binding ( $\Delta H^\circ$ ) with temperature for the binding of (a) MB (■), (b) NMB (●), (c) AZB (▲) and (d) AZA (□) with tRNA.

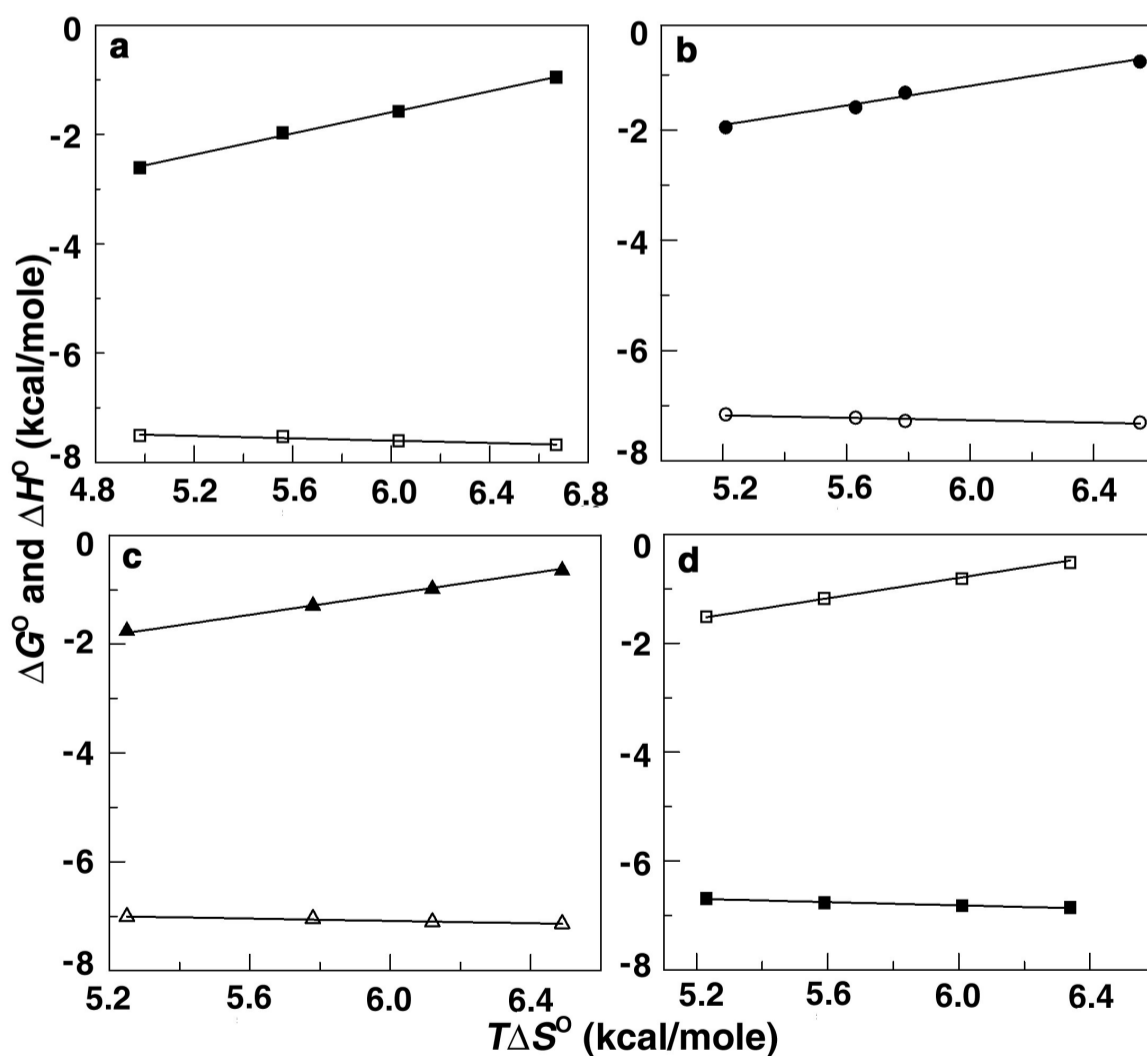

Fig. S3 Plot of  $\Delta G^\circ$  and  $\Delta H^\circ$  versus  $T\Delta S^\circ$  for the binding of (a) MB (□,■), (b) NMB (○,●), (c) AZB (△,▲) and (d) AZA (■,□) and with tRNA.

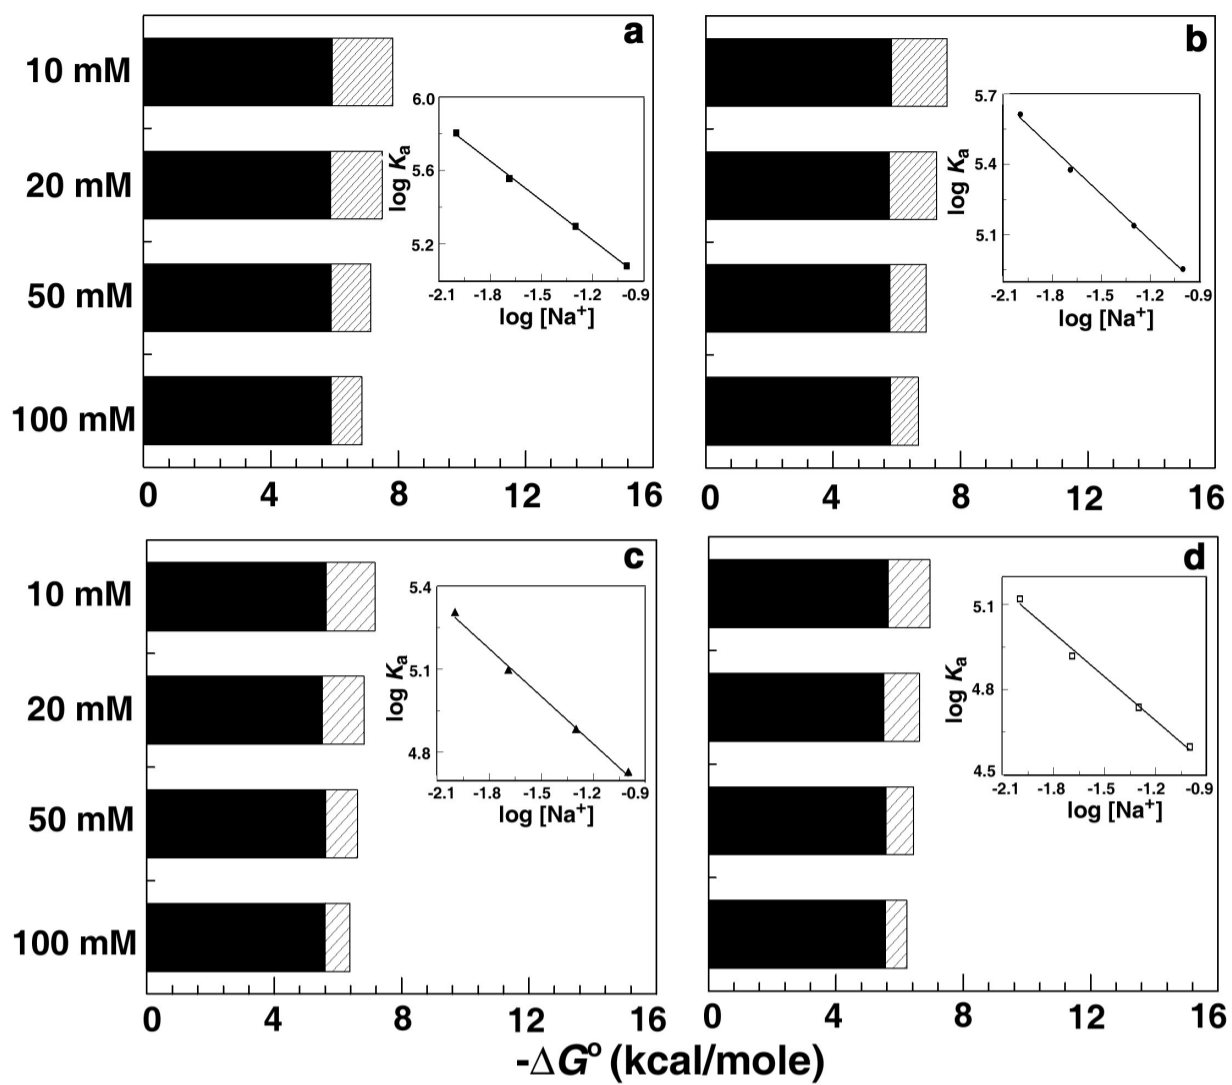

Fig. S4 Polyelectrolyte ( $\Delta G_{pe}^o$ ) (hatched area) and non-electrostatic ( $\Delta G_t^o$ ) (black area) contribution to the standard Gibbs energy change of the complexation for (a) MB, (b) NMB, (c) AZB and (d) AZA. Inset: Variation of  $\log K_a$  versus  $\log [Na^+]$  for (a) MB (■), (b) NMB (●), (c) AZB (▲) and (d) AZA (□).
